# Supplementary material for: A Conserved DNA Repeat Promotes Selection of a Diverse Repertoire of Trypanosoma brucei Surface Antigens from the Genomic Archive
Source: PubMed Central journal article supplement (PMC4858185; doi:10.1371/journal.pgen.1005994), 2016-05-05

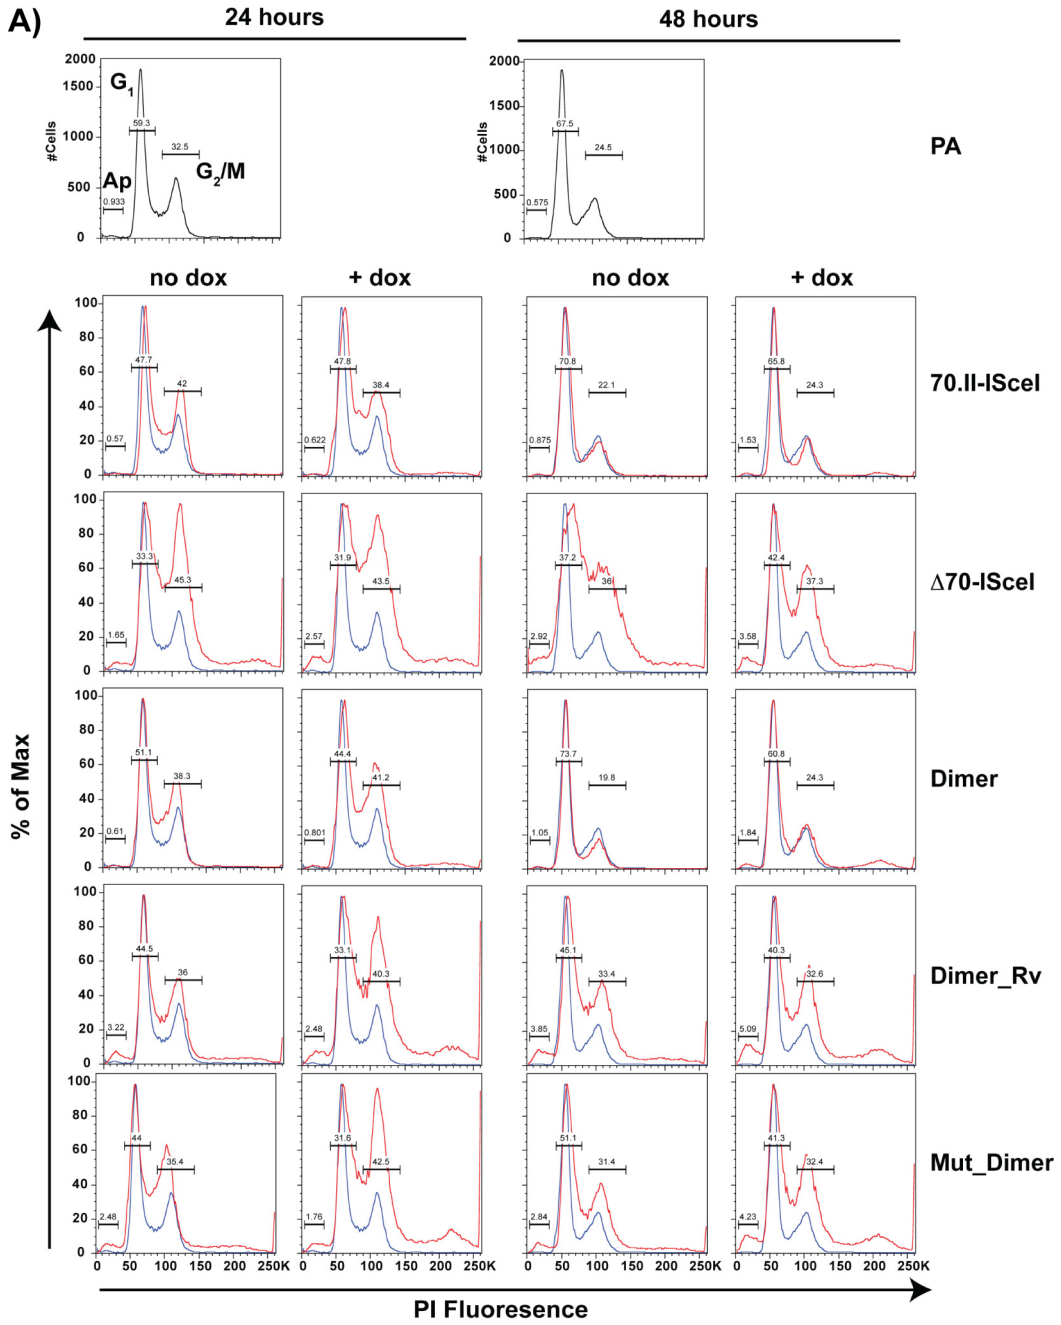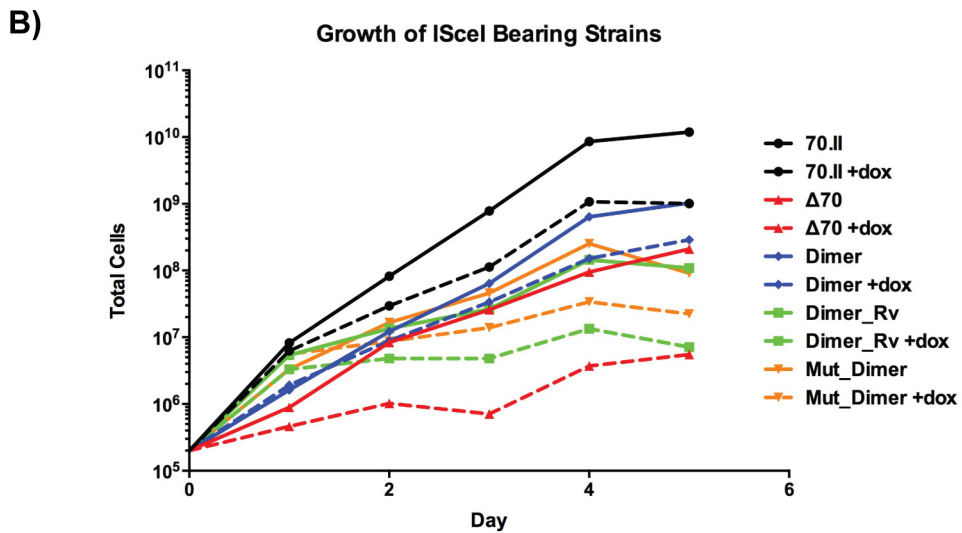

Supplement: pgen.1005994.s003.pdf [file pgen.1005994.s003.pdf]
