# Supplementary material for: A Conserved DNA Repeat Promotes Selection of a Diverse Repertoire of Trypanosoma brucei Surface Antigens from the Genomic Archive
Source: PubMed Central journal article supplement (PMC4858185; doi:10.1371/journal.pgen.1005994), 2016-05-05
Supplement: pgen.1005994.s004.pdf [file pgen.1005994.s004.pdf]

Lister427 BES1 Repeats FASTA Files (70.I & 70.II)

>70.1-73

ATGATAATAGTAATGATAATAGGAGAGTGATGTTGGTTAGATTTA--CAAAGTTATTCTCAAAAAA-  
TAATGATA

>70.1-132

CAAAAAATAATGATAATAATAGGAGAGTGTTGTGAGTGTGAGTATATACGAATATTATAATAAGAGCAGT  
AATAATA

>70.1-218

ATGATAATAATAATAATAATAGAAGAGTGTTGTGAGTGTGTATATA--  
CAAATATTATAATAAGAGCAGTAGCGATA

>70.1-401

ATAATAATAATAATAATAATAGGAGAGTGTTGTGAGTGTGCATATA--  
CGAATATTATAATGACAGCAGTTTTAGAC

>70.2-224

ATAATAATGATAATAATAATAGGAGAGTGTTGTGAGTGTGTGTATATACGAATATTATAATAAGGGCAGT  
AATAATA

>70.2-316

ATGATAATGATAATAATAATAGGAGAGTGTTGTGAGTGTGTGTATATACGAATATTATAATAAGAGCAGT  
AATAATA

>70.2-411

ATGATAATAATAATAGTGATAGTAGAGTGTTGTAAGTGTGTGTATATACGAATATTATAATAAGGGCAGT  
AATAATA

>70.2-503

ATGATAATGATAATAATAATAGGAGAGTGTTGTGAGAGTG--  
TATATACGAATATTATAATAAGAGCAGTAATAATA

>70.2-598

ATTATAATAA-  
AATAATAATAGAAGAGTGTTGTGAGTGTGTGTATATACAAATATTATAATAAGAGCAGTAATAATA

>70.2-672

ATAATAATAATGATATTATTAGAAGAGTGTTGTGAGTGTGT--  
ATATACGAATATTATAATAAGAGCAGTGATAATA

>70.2-768

ATAATAATAA-  
AATAATAATAGAAGAGTGTTGTGAGTGTGTGTATATACGAATATTATAATAAGAGCAGTGATAATA

>70.2-850

ATGATAATAATAATAATAATAGAAGAGCGTTGTGAGTGTGT--  
ATATACGAATATTATAAGAAGAGCAATAATAATA

>70.2-931

ATGATAATAATAATAAAAAATAGGAGAGTGTTGTGAGTGTGTGTATATACGAATATTATAAGAAGAGCAGT  
AATAATA

>70.2-1014

ATAATAATAATAATAATAATGGGAGAGTGTTGTGAGTGTGTGTATATACGAATATTATAAGAAGAGCAGT  
AATAATA

>70.2-1097

ATGATAATAATAATAATAATAGGAGAGTGTTGTGACTGTGTATATA--  
CGAATATTATAAGAAGAGGAGTAATAATA

>70.2-1178

ATGATAATAATAATAAAAAATAGGAGAGTGTTGTGAGTGTGTGTATATACGAATATTATAAGAAGAGCAGT  
AATAGTA

>70.2-1264  
ATAATAAATGATATTAATAGGAGAGTGTTGTGAGTGTGTGCATATACGAACATTATAATAAGAGCAGT  
AATAATA  
>70.2-1338  
ATAATAAATAATAATAAGAGGAGAGTGTTGTGAGTGTGCGTATATACCAGTATTATAATAAGAGCAGT  
AATAATA  
>70.2-1424  
ATAGTAATAATAATATTAATAGGAGAATGTTGTGAGTGTGTGCATATACGAATATTATAATAAGAGAAGT  
AATAATA  
>70.2-1501  
GTAAAGATGATAATGATAATAGGAGTGTTGTGAGTGTATGTATATACGAATATTATAATAAGAGCAGT  
AATAATG  
>70.2-1605  
ATGATGATAATGAAAATAATAGGAGTGTTGTGAGTGTGTATATA--  
CGAATATTATAATAAGAGCAGTAATAATG  
>70.2-1695  
ATGATAAATAATAATAATAGGAGAGTGTTGTGAGAGTGT--  
ATATACGAATATTATAATAAGAGCAGTAATAATA  
>70.2-1773  
ATGATAAATAATAA-----GGAAAGTGTTGTGAGTGTGT--  
ATATACGAATATTATAATAAGAGCAGTAATAATA  
>70.2-1839  
ATAGTAATAATAATAATGATAGGAGAGTGTTGTGAGTGTGTGTATACTAATATTATAATGA--  
GAGCAGTAATAATA  
>70.2-1911  
ATAGTAATGATAAATAATAATAGGAGAGTGTTGTGAGAGGGTGTATATACAAATATTATAATAAGAGCAGT  
AATGATA  
>70.2-2015  
ATAGGAATAATGATAATAATAGGAGAGTGTTGTGAGTGTGT-----  
ACGAATATTATAATAAGAGCAGTAATGATA  
>70.2-2107  
ATAATAATAGGAATAATAATAGGAGAGTGTTGTGAGGGTGTGTATATACGAATATTATAATAAGAGCAGT  
AATGATA  
>70.2-2196  
ATAGGAATAATGATAATAATAGGAGAGTGTTGTGAGTGTGT-----  
ACGAATATTATAATAAGAGCAGTAATGATA  
>70.2-2279  
ATAGGAATAATGATAATAATAGGAGAGTGTTGTGAGGGTGTGTATATACGAATATTATCATGAGAGCAGT  
AATAGTA  
>70.2-2365  
ATAGGAATAATGATAATAATAGGAGAGTGTTGTGAGTGTGT-----  
ACGAATATTATAATAAGAGCAGTAATGATA  
>70.2-2448  
ATAGGAATAATGATAATAATAGGAGAGTGCTGTGAGGGTGTGTATATACGAATATTATAATGAGAGCAGT  
AATAGTA  
>70.2-2528  
ATAATAAATAAATGATAATAAGAGAGTGCTGTGAGAGTGTGTATATACGAATATTATAATAAGAGCAGT  
AATGATA  
>70.2-2617  
ATAGGAATAATGATAATAATAGGAGAGTGTTGTGAGTGTGT-----

ACGAATATTATAATAAGAGCAGTAATGATA  
>70.2-2784  
ATAGGAATAATGATAATAATAGGAGAGTGTTGTGAGGGTGTGTATATACAAATATTATAATAAGAGCAGT  
AATGATA  
>70.2-2873  
ATAATGATAATGATGATAATAGGAGAGTGTTGTGAGAGTGTATATATGCGAGTATTATAATAAGAGTAGT  
AATGATA  
>70.2-2962  
ATAATAATAATAATAATGATAGGAGAGTGTTGTGAGTGTGTGTATATACGAATATTATAATAAGAGCAGT  
AATAATA  
>70.2-3039  
ATAATAATGATAATGATAATAGAAGAGTGTTGTTAGTGTGTATATA--  
CGAATATTATAATAAGAGCAGTAATAATG  
>70.2-3108  
ATAATGATAATGATAATATCAGGAGAGTGTTGTGAGTGTGTATATA--  
CGAATATAATAATAAAAGCAGTAATAATA  
>70.2-3186  
ATAATAATAATGATAATGATAGGAGAGTGTTGTGAGTGTGTGTATATACGAATATTATAATAACACCAGT  
AATAGTA  
>70.2-3269  
ATAAGAATCATAATGATAATAGGAGAGTGTTGTGAGTGT--  
ATATATACAAATATTATAATAAGAGCAGTACTAATG  
>70.2-3335  
GTACTAATGATAATAATATTAGGAGAGTGTTGTGAGTGTGTGTATATACGAATATTATACTAAGAGCAGT  
AATAAGT  
>70.2-3406  
ATAAGTATAATAATAATAATAGGAGAGTGTTGTGAGTGTGTGCTTA--  
CCAATATTATAATAATGATAGTAACGACC

#### Lister427 BES4 Repeats FASTA Files

>BES4 REPEAT-65  
ATAATAATAATGATAATGATAGAAGAGTGTTGTGAGAGTG--  
TTTATACGAATATTATAATAAGAGCAGTAATAATA  
>BES4 REPEAT-131  
GTAATAATAATGATAATAATAGGAAAGTGTTGTGAGTGTGTGTATATACAAATATTATAATAAGAGCAGT  
ACTAATA  
>BES4 REPEAT-220  
ATAGTAATAATAATAATAATAGGAGAGTGTTGTGAGTGTGTGTGTATATACGAATATTATAATAAGAACA  
GTAATAA  
>BES4 REPEAT-305  
ATAATAATAATAATAGTGATAGGAAAGTGTTGTGAGTGTGTGTATATACAAATATTATAATAAGAGCAGT  
AATAATA  
>BES4 REPEAT-388  
GTAAAAATAATGATAATGATAGGAGAGTGTTGTGAGTGTGTGTATATACAAATACTATAATAAGAGCAGT  
AATAACA  
>BES4 REPEAT-462  
ACAATAATAATGATAATAATAGGAGAGTGTTGGGAGTGTGTATATA--  
CGAATATTATAATAAGAGCAGTAATAATG

>BES4 REPEAT-525  
GCAGTAATAATGATAATAATAGGAGAGTGTTGTGTGTGTGGATATA--  
CGAATATTATAATAAGAGCAGTAATAATA  
>BES4 REPEAT-594  
ATAATAATAATAATAATAATAGGAGAGTGTTGTGAGTGTGTGCATATACGAATATTGTAATGAGAGCAGT  
ATCAATA  
>BES4 REPEAT-671  
ATAATAATAATGATAATGATAGAAGAGTGTTGTGAGAGTGTTTATA--  
CGAATATTATAATAAGAGCAGTAATAATA  
>BES4 REPEAT-737  
GTAATAATAATGATAATAATAGGAAAGTGTTGTGAGTGTGCATATA--  
CGGATATTATAATAAGAGCAGTAATAATA  
>BES4 REPEAT-815  
ATAATGATAATAATGATAATAGGAGTGTTGTGAATGTGTATATA--  
CGAATATTATAATACGAGCAGTAATAATA  
>BES4 REPEAT-923  
ATAATAATAATAATAATAATAGGAGAGTGCTGTGAGTGTGTGTATATACGAATATTATAATAAGAGCAGT  
AATAATA  
>BES4 REPEAT-1012  
ATGATAATAATAATAATAATAGGAGAGTAATGTGAGTGTGTATATA--  
CGAATATTATAATGAGAGCAGTATCAATA  
>BES4 REPEAT-1087  
ATAATAATAATGATAATGATAGAAGAGTGTTGTGAGAGTGTTTATA--  
CGAATATTATAATAAGAGCAGTAATAATA  
>BES4 REPEAT-1153  
GTAATAATAATGATAATAATAGGAAAGTGTTGTGAGTGTGTGTATATACGAATATTATAATGAGAGCAGT  
ACAATA  
>BES4 REPEAT-1242  
ATGATAATAATAATAATAATAGGAGAGAGTTGTGAGTGTGTGTATATACGAATATTATAATGAGAGCAGT  
AATAATA  
>BES4 REPEAT-1316  
ATAATAATGATAATAATGATAGGAGAGTGTTGTGAGTGTGTATATC--  
CGAATATTATAATACGAGCAGTAATAATA  
>BES4 REPEAT-1394  
ATAATGATGATGATGATAATAGAAGGGTGTTGTGAGTCTGTGTATA--  
CGAATATTATAATAAGAGCAGTAATAACA  
>BES4 REPEAT-1466  
ACAATAATAATGATAATAATAGGAGAGTGTTGTGAGTGTG--  
TATATACGAATATTATAATGAGAGCAGTATCAATA  
>BES4 REPEAT-1541  
ATAATAATAATGATAATGATAGAAGAGTGTTGTGAGAGTGT--  
TTATACGAATATTATAATAAGAGCAGTAATAATA  
>BES4 REPEAT-1607  
GTAATAATAATGATAATAATAGGAAAGTGTTGTGAGTGTGTGTATATACGAATATTATAATGAGAGCAGT  
ACAATA  
>BES4 REPEAT-1696  
ATGATAATAATAATAATAATAGGAGAGAGTTGTGAGTGTGTGTATATACGAATATTATAATGAGAGCAGT  
AATAATA  
>BES4 REPEAT-1770  
ATAATAATGATAATAATGATAGGAGAGTGTTGTGAGTGTGT--

ATATCCGAATATTATAATACGAGCAGTAATAATA  
>BES4 REPEAT-1848  
ATAATGATGATGATGATAATAGAAGGGTGTGAGTCTGTGTATA--  
CGAATATTATAATAAGAGCAGTAATAACA  
>BES4 REPEAT-1920  
ACAATAATAATGATAATAATAGGAGAGTGTGGGAGTGTG--  
TATATACGAATATTATAATAAGAGCAGTAATAATG  
>BES4 REPEAT-1983  
GCAGTAATAATGATAATAATAGGAGAGTGTGAGTGTGTG-GA-  
TATACGAATATTATAATAAGAGCAGTAATAATA  
>BES4 REPEAT-2052  
ATAATAATAATAATAATAATAGGAGAGTGTGAGTGTGTGCATATACGAATATTGTAATAAGAGCAGT  
AATAATA  
>BES4 REPEAT-2123  
ATAATAATAATAATAATAATAGGAGAGTGTGAGTGTGTGTATATACAAATATTATAATAAGAGCAGT  
AATAATA  
>BES4 REPEAT-2203  
ATAATAATGATAACAATAACAGGAAAGTGTGAGTGTGC--  
ATATACGGATATTATAATAAGAGCAGTAATAATA  
>BES4 REPEAT-2281  
ATAATGATAATAATGATAATAGGAGTGTGTTGTGAATGTGT--  
ATATACGAATATTATAATACGAGCAGTAATAATA  
>BES4 REPEAT-2389  
ATAATAATAATAATAATAATAGGAGAGTGTGAGTGTGTGTATATACGAATATTATAATAAGAGCAGT  
AATAATA  
>BES4 REPEAT-2478  
ATGATAATAATAATAATAATAGGAGAGTAATGTGAGTGTG--  
TATATACGAATATTATAATAAGAACAGTAATAGTA  
>BES4 REPEAT-2553  
ATAACAATAATAAATTGTAGGAGAGTGTGAGTGTGTGTATATACGAATATTATAATAAGAGCAGT  
AATAGTA  
>BES4 REPEAT-2624  
ATAGTAATAATAATAATAATAGGAAAGTGTGAGTGTGTGTATATACGAATATTATAATAAGAACAGT  
AATAGTA  
>BES4 REPEAT-2701  
ATAACAATAATAAATTGTAGGAGAGTGTGAGTGTGTGTATATACGAATATTATAATAAGAGCAGT  
AATAATA  
>BES4 REPEAT-2931  
ATAATAATAATAATAATGATAGGAGAGTGTGTAAGTGTGTGT--  
ATACAAATATAATAATAATAGTAGTAATAATA  
>BES4 REPEAT-3006  
GTAATGATGATGGTGATAATAGGAGAGTGTGAGTATGTGTATA--  
CAAATATAATAATAAGAGTAGTAACAATA  
>BES4 REPEAT-3090  
ATGATAATAATAATAATAATAGGAGAGTGTGAGTGTGTATATACAAATATTATAATAATAGGAGT  
AATTATG  
>BES4 REPEAT-3179  
ATAATGATAATGATAATAATAGAAGAGTGTGAGTGTGTGTATATACGAATATTATAATAAGAGCAGT  
AATAATA  
>BES4 REPEAT-3256

ATAATGATAATGATAATAATAGAAGAGTGTTGTGAGTGTGTGTATATACGAATATTATAATAAGAGCAGT  
AATAATA  
>BES4 REPEAT-3333  
ATAATGATAATGATAATAATAGAAGAGTGTTGTGAGTGTGTGTATATACGAATATTATAATAAGAGCAGC  
AATGACA  
>BES4 REPEAT-3413  
ATAATAATAATGCTAATAATAGAAGAGTATTGTGAGTGTATGTATA--  
CGAATATTATAATAAGAGCAGTAATAATA  
>BES4 REPEAT-3494  
ATAATAGGAATAATGATAATAAGAGAGTGTTGTCAGTGTGTGCATATACGAATATTATAATAAGAGCAGT  
AATATTA  
>BES4 REPEAT-3571  
ATAGTAATGATGATAATAATAGAAGAGTGTTGTGAGTGTGTGTGTATACGAATATTATAATAACAGCAGT  
AATAATA  
>BES4 REPEAT-3636  
GCAGTAATAATAATAATAATAGAAGAATGTTGTGAGTGTGTGTGTATACGAATATTATAATAAGGCCAGT  
AATAATG  
>BES4 REPEAT-3707  
ATAATGATGATGATAATGATAGGAGAGTGTTGTGAGTGTGT--  
ATATACGAATATTATAATAAGAGCAGTAATAATG  
>BES4 REPEAT-3785  
ATGATGATAATAATAATAATAAGAGAGTATTGTGAGTGTG--  
TATATACGAATACTATAATAAGAGCAGTAATAATA  
>BES4 REPEAT-3866  
ATGATAATAATAATAATAATAGAAGAGTGTTGTGGGTGTGT--  
ATATACGGATATTATAAGAAGAGCAGTAATAATA  
>BES4 REPEAT-3947  
ATGATGATGATAATAATAATAGAAGAGTGTTGTGAGTGTGT--  
ATATACGAATATTATAATAATAGTTGTAATAATA  
>BES4 REPEAT-4016  
ATAATAATAATAATAATAATAGAAGAGTGTTGTGAGTGTGTGTTTATT--  
AATATTATAATAAGAGCAGTAATAATA  
>BES4 REPEAT-4085  
ATAATAATAATTATAATAATAGGAGAGTGTTGTGAGTGTATGTATA--  
CGAATATTATAATAAGAGCAGTAATAATA  
>BES4 REPEAT-4166  
ATAATAGGAATAATGATAATAAGAGAGTGCTGTAAGAGTGTGTATATACGAATATTATAATAACAGCAGT  
AATAAAA  
>BES4 REPEAT-4249  
ATAATAATGATGATAATAATAGAAGAGTGTTGTGAGTGTGTATATATACAAATATTATAATAATAGGAGT  
AATTATG  
>BES4 REPEAT-4338  
ATAATAGGAATAATGATAATAAGAGTGTGTTGTCAGTGTGTGCATATACGAATATTATAATAAGAGCAGT  
ACAATG  
>BES4 REPEAT-4409  
ACAATGATAATAATAATAATAGGAGTGTGTTGTAAGTGTGTGTATATACGAATATTGTAATGAGAGCAGT  
AATAAAA  
>BES4 REPEAT-4477  
GTAATAAAAATGATAATAATAGGAGAGTGTTGTGAGTGTGTGTATA--  
CGAATATTATAATAAGAAAAATAATAATA

>BES4 REPEAT-4579  
ATGATGATAATAATAATGATAGGAGAGTGTTGTGAGTGTGTGTATATACGAATATTATAATAAGAGCAGT  
AATAATA  
>BES4 REPEAT-4647  
GTAATAATAGTAATAATAATAGGAGAGTGTTGTGAGTGTGTATATA--  
CGAATATTATAATAAGAGCAGTAATAATA  
>BES4 REPEAT-4713  
GTAATAATAGTAATAATAATAGGAGAGTGTTGTGAGTGTGT--  
ATATACGAATATTATAATAAGTGCAGTAATAGTA  
>BES4 REPEAT-4797  
ATAATAATAATAA-AATGGTATCAGAGTGTTGTGAGTGTGTGCATA--  
CGAATATTATAATAAGAGCAGTAATAATG  
>BES4 REPEAT-4916  
ATGATGATAATAATAATGATAGGAGAGTGTTGTGAGTGTGTGTGTATACGAATATTATAATGAGAGCAGT  
AATAATA  
>BES4 REPEAT-4999  
ATAATAATGGTAGTGATATTAGGAGAGTGTTGTGAGTGTGTGTATA--  
CGAATATTATAATAAGAGCAGTAATGATA  
>BES4 REPEAT-5071  
ATAATAATAATAATGATGATAGGAGAGTGTTGTGAGTCTG--  
TATATACAAATATTATAATAAGAGCAGTAATGATA  
>BES4 REPEAT-5143  
ATAATAATAATAATAATAATAGAAGAGTGTTGTGAGTGTG--  
TATATACGAATATTATAATAAGAGCAGTAATACTA  
>BES4 REPEAT-5224  
ATAATGATAATAATAATAATAGGAGAGTGTTGTGAGTGTGTGTGTACTAAAATAATAAGAGTATTAAGA  
CTACAGT

#### Lister427 BES7 Repeats FASTA Files

>BES7 REPEAT-62  
ATAATAATAATAATAATAATGCGAAAGTGTTGTGAGTGTGTGTATATACGAATTTTATAGTAAGAGCAGT  
AATAACA  
>BES7 REPEAT-154  
ATAATAATAATAATAATAATAGGAGAGTGTTGTGAGTGTGTGTATATACGAATTTTATAGTAAGAGCAGT  
AATAACA  
>BES7 REPEAT-237  
ATAATAATAATAATAATAATAGGAGAGTGTTGTGAGTGTGTGCATATACGAATATTATAATACGAGCAGT  
AATAATA  
>BES7 REPEAT-317  
ATAATAATAATAATAATAATAGGAAAGTATTGTGAGTGTGTGTATATACGAATATTATAATAATAGCAGT  
ACAATA  
>BES7 REPEAT-394  
ATTATAATGATAATAATAATAGAAGAGTGTTGCGAGTGTGTATATA--  
CGAATATTATAAGAAGAGCAGTAATAGTA  
>BES7 REPEAT-463  
ATAGTAATAATAATAATGATAGGAAAGTGTTGTGAGTGTGTATATA--  
CAAATATTATAATAAGAGCAGTAATAATA  
>BES7 REPEAT-529

GTAATAATAATAATAATAATAAAAAGAGTTTTGTGAGTGTGTCCATATACGAATATTATAATGAGAGCAGT  
AATAATA  
>BES7 REPEAT-606  
GTAATAATAATAATAATAATAAAAAGAGTGTGAGTGTGTATATA--  
CGAATATTATAATAAGAGTAGTAATAATA  
>BES7 REPEAT-681  
ATAATGATAATAATAATAATAGGAGAGTTTTGTGAGTGTCTGTATATACTAATATTATAATAAGAGTAGT  
AATAATA  
>BES7 REPEAT-764  
ATAATAATAATGATAATAATAGGAGAGTTTTGTGAGTGTG--  
TATATACGAATATTATAATAAAAAGTAGTAATAATA  
>BES7 REPEAT-845  
ATAATAATAATAATAATAAAGAAAGTGTGTTGTGAGTGTGTATATACGAATATTATAATAAGAGCAGT  
AAAAATA  
>BES7 REPEAT-925  
ATGATGATGGTAATAATAATAGGAGCGTGTGAGTGTGTATATA--  
CGAATATTATAATAAGAGCAGTATTAATA  
>BES7 REPEAT-1003  
ATAATAGTAATGACAATGATAGAAGAGTGTGAGAGTGTGTATA--  
CAAATATTATAATAAGAGCAGTAATAATA  
>BES7 REPEAT-1084  
ATGATAATAATAATAATAATAGAATAGTCTTGTGAGTGTGTATATA--  
CGAATATTATAATAAGAGCAGTAATAATG  
>BES7 REPEAT-1153  
ATAATGATAATAATAATGATAGGAGAGTGTGAGTGTGTGTATATACGAATATTATAATAAGAGCAGT  
ATTAATA  
>BES7 REPEAT-1233  
ATAATAGTAATGACAATGATAGAAGAGTGTGAGTGTGTGTATATACGAATATTATAATGAGAGCAGT  
AATAATA  
>BES7 REPEAT-1319  
ATAATGATGATAATAATAATAGGAGAGTGTGAGTGTGTGTATATACGAATATTATAATAAGAGCAGT  
ATTAATA  
>BES7 REPEAT-1390  
TTAATAATAATAATAATGATAGGAGAGTGTGAGTGTATGTATAT--  
GAATATTATAATAAGAGCAGTTATAATA  
>BES7 REPEAT-1462  
ATAATAATGATGATAATGATAGAAGAGTGTGAGTGTGTGTATATACGAATATTATAATGAGAGCAGT  
AATAATA  
>BES7 REPEAT-1545  
AAGATAATGATGATAATAATAGAATAGTCTTGTGAGTGTGTATATA--  
CGAATATTATAATAAGAGCAGTAATAATG  
>BES7 REPEAT-1614  
ATAATGATAATAATAATGATAGGAGAGTGTGAGTGTGTGTATATACGAATATTATAATAAGAGCAGT  
ATTAATA  
>BES7 REPEAT-1694  
ATAATAGTAATGACAATGATAGAAGAGTGTGAGTGTGTGTATATACGAATATTATAATGAGAGCAGT  
AATAATA  
>BES7 REPEAT-1780  
ATAATGATGATAATAATAATAGGAGAGTGTGAGTGTGTATATA--  
CGAATATTATAATGAGAGCAGTAGTAATA



>BES7 REPEAT-1984  
GTAATAATCATAATAATGATAGGAGAATGTTGTGAGTGTGTGTATA--  
CGAATATTATAATAAGATCAGTAATAATA  
>BES7 REPEAT-2065  
GTGATGATAATAATGATAATAGGAGAGTGTTGTGAGTGTGTGCATATACGAATCTTATAATAAGAGCTGT  
ACTAATA  
>BES7 REPEAT-2148  
ATAATAATGGTAATAATAATAGGAGAGTGTTGTGAGTGTGTGCATATACGAATATTATATTAAGAGCAGT  
AATAATA  
>BES7 REPEAT-2231  
GTAATAATAATAATAATGATAGGAAAGTGTTGTGAGTGTGTGTATATACGAATATTATAATAAGAGCAGT  
AATAATA  
>BES7 REPEAT-2311  
ATGATAATAGCAGTAATAATAGGAGAGTGTTGTGAGTGTGTGTATA--  
CAAATATTATAATAAGAGTAGTAATAATA  
>BES7 REPEAT-2389  
ATGATAATAGCAGTAATAATAGGAGAGTGTTGTGAGTGTGTGTATATACGAATATTATAATGACAGCTGT  
ACTAATG  
>BES7 REPEAT-2478  
ATGATGATAATAATGATAATAGGAGAGTGTTGTGAGTGTGTGCATATACGAATCTTATAATAAGAGCAGT  
AATAATA  
>BES7 REPEAT-2564  
ATGATAATAATGATAATAATAGGAGAGTGTTGTGAGTGTGTG--  
TATACGAATATTATAATAAAAAGCAGTAATGATA  
>BES7 REPEAT-2645  
ATGATAATAATAATAATAATAAGAGAGTGTTGTGAGTCTGTATCTG--  
CGAATATTATAGTAAGAGCAGTAATCGTA  
>BES7 REPEAT-2729  
GTAATAATAATGATAATTATTGGAGAGTGTTGTGAGTCTGTATCTG--  
CGAATATTATAGTAAGAGCAGTAATCGTA  
>BES7 REPEAT-2813  
GTAATAATAATGATAATTATTGGAGAGTGTTGTGAGTGTGTA-----  
CGAATATTATAATAAGACCAGTAATAATA  
>BES7 REPEAT-2881  
ATAATAATGATAATAATAATAAGGATATTGTTGTGAGAGTGTGAATATACGAATATTATAATAACAGCAGT  
AATAATA  
>BES7 REPEAT-2957  
ATAATAATAATGGTAATAATAGAAGAGTGTTGTGAGTGTGAGTATATACGAATATTATAATAAGAGCAGT  
AATAATA  
>BES7 REPEAT-3046  
ATAATAATAATAATAATAATAGGAGAGTGTTGTGAGTGTGTGTATA--  
CGAACATTATAGTAAGAGCAGTAATAATA  
>BES7 REPEAT-3130  
ATAATAATAGTAATAATAATAGGAGAGTGTTGTGA-  
TATGTGTATATACGAATTTTAAAATTAGAGGAGTAATAATA  
>BES7 REPEAT-3206  
ATAGTAATGATGGTAATAATAGGAGAGTGTTGTGAGTGTGAGTATATACGAATATTATAATGAGAGCAGT  
AATAATA  
>BES7 REPEAT-3286  
TTTATAATAATGATAATAATAGAAGGGTGTTGTGTGTGTGAGTATATACGAATATTATAATAAGAGCAGT

AATAATG  
>BES7 REPEAT-3372  
ATAATAGGAATGATAATAATAGAAGAGTGTTGTGAGTGTGTGTATA--  
CGAATATTATAATAAGAGCAGTAATAATG  
>BES7 REPEAT-3453  
ATAATAATAGTAATGATAATAGGAGAGTTTTGTGAGAATGT--  
ATATACGAATATTATAATAAGAGCAGGAATAATA  
>BES7 REPEAT-3540  
ATAATAATGATGATAATAATAGGAGAGTCTTGTGAGTGTGTATAT--  
GCGAATATTATAATAAGAGCAGTAATAATA  
>BES7 REPEAT-3612  
ATAATAATAATAATAATAATAGGAGAGTGTTGTGAGTGTGT--  
ATATACGAATATTATAATAAGAGCAGTAATAATA  
>BES7 REPEAT-3693  
ATAATGATGATAATAATAATAGGAGTGTGTTGTAAGTGTGT--  
ATATACGAATATTATAATAAGAGCAGTAATAATA  
>BES7 REPEAT-3765  
ATAATAATAATAATGATAATGGGAGAGTGTTGTGAGTGTGT--  
ATATACGAATGTTATAATAAGAGCAGTAATAATA  
>BES7 REPEAT-3843  
ATGATAGTAATGATGATAATAGGAGAGTGTTGTGAGTGTGTGTATA--  
CGAATATTATAATAAGAGTAGTAATGATA  
>BES7 REPEAT-3927  
ATAATGATAATGATAATAATAGGAGAGTGTTGTGAGTGCG--  
TATATACGAATATTATAATAAGAGTAGTAATGATA  
>BES7 REPEAT-4005  
ATAATAATAATGATAATAATTGGAAAGTGTTGTGAGTGTGTGTATATACGAATATTATAATAAGAGCAGT  
AATAACA  
>BES7 REPEAT-4094  
ATAATGATAATAATAATAATAGAAGAGTGTTGTGAGTGTGTATATATACTAATATTATAATAAGAGCAGT  
AATAATA  
>BES7 REPEAT-4180  
ATAATGATAATAATAATAATAGGAGAGTGTTGTGAGTTTGTATATATACGAATATTATAATAGGAGCAGT  
AATAATA  
>BES7 REPEAT-4263  
ATAATAATAAGGATAATAATAGGAGAGTGTTGTGAGTGTATGTATATACTAATATTATAATAAGAGCAGT  
TATAATA  
>BES7 REPEAT-4352  
ATAATAGTAATAATAATGATAGGAGAGTGTTGTGAGTGTGTATATA--  
CAAATATTATAATGAGAGCAGTAATAATA  
>BES7 REPEAT-4436  
ATGATGATAATAATAATAATAGGAGAGAGTTGTGAGTGTGT--  
ATATACGAATATTATAATAAGAGCAGTAGTAATG  
>BES7 REPEAT-4517  
ATGATGATGATAATAATGATAGGAGAGTGTTATGAGTGTGTGTATATACGAATATTATAATAAGAGCAGT  
AATAATA  
>BES7 REPEAT-4600  
ATAATAATAAGGATAATAATAGGAGAGTGTTGTGAGTGTATGTATATACTAATATTATAATAAGAGCAGT  
TATAATA  
>BES7 REPEAT-4689

ATAATAGTAATAATAATGATAGGAGAGTGTTATGAGTGTGTGTATATACGAATATTATAATAAGAACAGT  
AATAATA  
>BES7 REPEAT-4769  
ATGATGATAATAATAATAATAATAGAGTGTTGTGAGTGTTCCATATACGAATATTATAATAAGAGCAGT  
AATAATA  
>BES7 REPEAT-4864  
ATAATGATGATGATGATAATAGGAGAGTGTTGTGAGTGT-----  
ATATACGAATATTATAATAACAGAAGTAATTATA  
>BES7 REPEAT-4961  
ATAATAATAATAATAATAATAGGAGAGTGTTGTGAGTGTGT--  
ATATACGAATATTATAATAAGAGCAGTAATAGTA  
>BES7 REPEAT-5036  
ATAATAATGATAATGATAATAGAAGAGTGTTGTGAGTGTGT--  
ATATACGCATATTATAATAAGAGCAGTAATAATA  
>BES7 REPEAT-5099  
GCAGTAATAATAATGATAATAGGAGAGTGTTGTGAGTGTGTGTATATACGAATATTATGATAAGAGCAGT  
AATGATA  
>BES7 REPEAT-5176  
ATAATAATAATAATAATGATAGGAGAGTGTTGTGAGTGTGT--  
ATATACGCATATTATAATAAGAACAGTAATAATA  
>BES7 REPEAT-5254  
ATGATGATAATAATAATAATAATAGAGTGTTGTGAGTGTTCCATATACGAATATTATAATAAGAGCAGT  
AATAATA  
>BES7 REPEAT-5349  
ATAATGATGATAATAATAATAGGAGAGTGTTGTAAGTGTGTGTATATACGAATATTATAATAAGAGCAGT  
AATGATA  
>BES7 REPEAT-5444  
ATAATGATAATGATAATAATAGGAGAGTGTTGTGAGTGTGTGTATATACGAATATTATAATAAAAGCAGT  
AATAATA  
>BES7 REPEAT-5521  
ATAATAATGATAATAATGATAGGAGAGTGTTGTGAGTGTGT--  
TATATACGAATATTATAATAAGAGCAGTAATAATA  
>BES7 REPEAT-5602  
ATAATAATGATAATAAAAATAGGAGAGTGTTGTAAGTGTGTGTATATACAAATATTATAGTAAGAGCAGT  
AATAATA  
>BES7 REPEAT-5673  
ATAATAATGATAATAAAAATAGGAGAGTGTTGTAAGTGTGTGTATATACAAATATTATAGTAAGAGCAGT  
AATAATA  
>BES7 REPEAT-5744  
ATAATAATGATAATAAAAATAGGAGAGTGTTGTAAGTGTGTGTATATACAAATATTATAGTAAGAGCAGT  
AATAATA  
>BES7 REPEAT-5815  
ATAATAATGATAATAATAATAGGAGAGTGTTGTAAGTGTGTGTATATACGAATATTATAATAAGAGCAGT  
AATGATA  
>BES7 REPEAT-5910  
ATGATGATAATGATAATAATAGGAGAGTATTGTG-GTCT---  
AAATTTCACTAAACAAGTTAAAGAATTTATTGCAG

TRU927 BES8S Repeats FASTA Files

>TREU927\_8S\_#1  
AAAGTAATGATGATAATAATAGGAGAGTGTTGTGAGTGTGTGTATGTGCGAATATTACAATGAGAGCAGT  
AATAATA  
>TREU927\_8S\_#2  
ATAATAATAATAATAATAATAGAAGAGTGTTGTGAGTGTGTGTATACACGAATATTACAATGAGAGCAGT  
AATAATA  
>TREU927\_8S\_#3  
ATAGTAATAATAATAATGATAGGAGAGTGTTGTGAGTGTGTATATATGCAAATATTATAATAAGAGCAGT  
AATAATA  
>TREU927\_8S\_#4  
ATAATAATAATAATAATAATAGGAGAGTGTTGTGAGTGTGTGTATATGA--  
ATATTATAATAAGAGCAGTAATATTA  
>TREU927\_8S\_#5  
ATATTAGTAATGATGATAATAGGAGAGTTTTAAGA-----  
GTGTATATACAAATATTATAATAAGAGCAGTAATAATA  
>TREU927\_8S\_#6  
ATAATAATAATAATAATGATAGGAGAGTGTTGTGCGTATGC--  
ATATACGAATATTATAATAAGAGCAGTAATGATA  
>TREU927\_8S\_#7  
AGAGCAGTAATGATAATAATAGGAGAGAGTGTTGTGAGTGTGTGTATACGAATATTATAATAAGAGTAGT  
AATAGTA  
>TREU927\_8S\_#8  
ATAATAATAATGATAATAATAGGAGAGTGTTGTGAGTGTGTGT--  
ATACGAATATTATAATAAGAGTAGTAATGATA  
>TREU927\_8S\_#9  
ATAATAATGATAGTAATAATAGAAGAGTGTTGTGAGTGTGT--  
ATATACGAATATTATAATAAGAGCAATAATAATG  
>TREU927\_8S\_#10  
ATAATAATGATAATGATAATAGGAGAGTGTTGTGAGTGTGTGTGTATACAAATATTATAGTAAGATTAGT  
GATAATG  
>TREU927\_8S\_#11  
ATGATGATGATGATAATGATGGAAGAGTGTTGTGAGTGTGCG--  
TATACGAATATTATAATAAGAGCAGTAATAATA  
>TREU927\_8S\_#12  
ATAATAATAATAATAATAATAAGAGAGTGTTGTAATTGT-T-  
TATATACTAATATTATAATAAGAGCAGTAATAATA  
>TREU927\_8S\_#13  
ATAATAATAATGATAATGATAGGAGAGTGTTGTGAGTGTGTGTATA--  
CAAATATTATAATAATAGTAGTAATAATA  
>TREU927\_8S\_#14  
ATAATAGTAATAATAATAATAGAAGAGTGTTGTGACTGTGTGTATA--  
CGAATATTATAATAATAGTAATAATAATA

#### TRU927 BES9S Repeats FASTA Files

>TREU927\_9S\_#1  
ATAATGATAATAATAATAATAG-AG--TGTTGTGAGTGTGT--  
ATATACGAATATTATAATAAGAGCAGTAATAATT

>TREU927\_9S\_#2  
ATGATAATGATGATAATGATAGGAGAGTGTTGTGAGTCTGT--  
ATATACCAGTATTATAATAAGAGCAGTAATAATA  
>TREU927\_9S\_#3  
ATAATAATGATGATGATGATAGGAGAGTGTTTTGAGTGTGTGTATATACGAATATTATAATAAGAGCAGC  
AGTAATA  
>TREU927\_9S\_#4  
ATAATAATGATGATAATAATAGGAGAGTGTTGTGAGTGCGTGT--  
ATACGAATATTATAATAAGAGCAGTAATGATA  
>TREU927\_9S\_#5  
ATAATAATAATGATAATAATAGGAGAGTGTTGTGAGTGTGTGTATATGCGAATATTATAATAAGTGCAGT  
TATGATA  
>TREU927\_9S\_#6  
ATAATAATAATAATGATAATAGGAGTGTGTTGTGAGTGTGT--  
ATATACAAATATTATAATAAGAACAATAATAATA  
>TREU927\_9S\_#7  
ACAATAATAATAATAATAATAGGAGAGTGTTGTGAGTGTGTGTATATACGAATATTATAATAAGAGCAGT  
AATAATA  
>TREU927\_9S\_#8  
ATGATGATAATAATAATAATAGCAGAATGTTGTGAGTGTGTGTATATACGAATATTATAATAAGAGCAGT  
AATAATA  
>TREU927\_9S\_#9  
AGAATAATAATGATAATGATAGGAGAGTGTTGTGAGTGTGTGTATATACGAATATTATAATAAGAGCAGT  
AATGATG  
>TREU927\_9S\_#10  
GAGCAGTAATGATGATAAGGATAAGAGAGTTGTGAGTGTGAGTATATACGAATATTATAATAAGAGCAGT  
AATGATA  
>TREU927\_9S\_#11  
ATAATGATAATGATGATAGTGGGAAAGTGTTGTGAGAGTG--  
TATATACGAATATTATAATAAGAGAAGTAATAATA  
>TREU927\_9S\_#12  
GTAATAATAATAATAATAATATGAGAGTGTTGTGAGTGTGTGTATATACGAATATTATAATATAAGCAGT  
AATGATG  
>TREU927\_9S\_#13  
ATGATAATAATGATAATAATAGGAGAGTGCTGTGAGTCTGT--  
ATATACGAATATAATAATAAGAGTAATAATAATA  
>TREU927\_9S\_#14  
ATAATGATAATAATAATAATAGTGGAGTGTTGTGAGTGTGTGTATATACGAATATTATAATAAAAGCAGT  
AATAATA  
>TREU927\_9S\_#15  
ATGATAATAATGATAATAATAGGAGAGTGTTGTGAGAGTGTGCATATACGAATATTATAATAAGAGCAGT  
AATAATA  
>TREU927\_9S\_#16  
ATAATAATGATAATAATAATAAGAGAGTATTGTGAGTGTA--  
GTATATACAAATATTATAATAAGAGCAGTAATAATA  
>TREU927\_9S\_#17  
ATAATAATAATGATAATAATAGGAGAGTGTTGTGAGAGTGTATGTATATTTCGAATATTATGTTAAGAACA  
GTAATAATA  
>TREU927\_9S\_#18  
ATAATGATGATAATAATAATAGAAGAGTGTTGTGAGTGTGTGTA--

TACGAATATTATAATAAGAGCAGTAATAATA
