# Supplementary material for: A Conserved DNA Repeat Promotes Selection of a Diverse Repertoire of Trypanosoma brucei Surface Antigens from the Genomic Archive
Source: PubMed Central journal article supplement (PMC4858185; doi:10.1371/journal.pgen.1005994), 2016-05-05
Supplement: pgen.1005994.s005.pdf [file pgen.1005994.s005.pdf]

| <b>Contig #</b> | <b>Contig Length</b> | <b>Lister427 VSG#</b> | <b>Distance to Repeat</b> |
|-----------------|----------------------|-----------------------|---------------------------|
| 25              | 3087                 | 643                   | 1654                      |
| 29              | 2138                 | 377                   | 429                       |
| 35              | 4398                 | 825                   | 2267                      |
| 40              | 2661                 | 542                   | 1032                      |
| 41              | 3524                 | 629                   | 1946                      |
| 43              | 2550                 | 315                   | 894                       |
| 48              | 2376                 | 541                   | 891                       |
| 51              | 3257                 | 567                   | 1412                      |
| 53              | 2906                 | 3340                  | 987                       |
| 54              | 2368                 | 666                   | 1027                      |
| 55              | 5319                 | 23                    | 3177                      |
| 59              | 3180                 | 600                   | 1445                      |
| 61              | 2561                 | 1963                  | 827                       |
| 62              | 3427                 | 832                   | 1697                      |
| 63              | 3244                 | 365                   | 1672                      |
| 64              | 2591                 | 618                   | 939                       |
| 65              | 3135                 | 663                   | 1637                      |
| 66              | 3747                 | 369                   | 1638                      |
| 68              | 3316                 | 507                   | 1645                      |
| 69              | 3601                 | 416                   | 1421                      |
| 72              | 3452                 | 622                   | 1872                      |
| 73              | 3958                 | 2075                  | 2226                      |
| 78              | 3050                 | 3338                  | 1400                      |
| 79              | 3400                 | 620                   | 1864                      |
| 85              | 2705                 | 637                   | 1223                      |
| 86              | 2918                 | 717                   | 1463                      |
| 89              | 3379                 | 476                   | 1271                      |
| 91              | 2645                 | 575                   | 1091                      |
| 92              | 2817                 | 444                   | 1093                      |
| 93              | 2530                 | 646                   | 1042                      |
| 94              | 2470                 | 647                   | 775                       |
| 95              | 3205                 | 826                   | 1506                      |
|                 |                      | <b>AVERAGE</b>        | <b>1421</b>               |
|                 |                      | <b>STDEV</b>          | <b>537</b>                |
