# Supplementary material for: A Conserved DNA Repeat Promotes Selection of a Diverse Repertoire of Trypanosoma brucei Surface Antigens from the Genomic Archive
Source: PubMed Central journal article supplement (PMC4858185; doi:10.1371/journal.pgen.1005994), 2016-05-05
Supplement: pgen.1005994.s006.pdf [file pgen.1005994.s006.pdf]

| 70.II Switched Clones | Population # | Switch Mechanism | VSG      | Genomic Location |
|-----------------------|--------------|------------------|----------|------------------|
| 2_A1                  | 1            | GC               | 427-631  | UD               |
| 2_A2                  | 1            | GC               | 427-8    | BES14            |
| 2_A3                  | 1            | GC               | 427-17   | BES13            |
| 2_A5                  | 1            | GC               | 427-8    | BES14            |
| 2_A6                  | 1            | GC               | 427-8    | BES14            |
| 2_A8                  | 1            | GC               | 427-25   | MC               |
| 2_B1                  | 1            | GC               | 427-21   | BES4             |
| 2_B10                 | 1            | GC               | 427-6    | BES3             |
| 2_B11                 | 1            | GC               | 427-631  | UD               |
| 2_B2                  | 1            | GC               | 427-374  | MC               |
| 2_B3                  | 1            | GC               | 427-8    | BES14            |
| 2_B5                  | 1            | GC               | 427-6    | BES3             |
| 2_B6                  | 1            | GC               | 427-11   | BES15            |
| 2_B7                  | 1            | GC               | 427-8    | BES14            |
| 2_B8                  | 1            | GC               | 427-3    | BES7             |
| 2_B9                  | 1            | GC               | 427-24   | MC               |
| 2_C1                  | 1            | GC               | 427-6    | BES3             |
| 2_C10                 | 1            | GC               | 427-3    | BES7             |
| 2_C11                 | 1            | GC               | 427-567  | MC               |
| 2_C3                  | 1            | GC               | 427-8    | BES14            |
| 2_C5                  | 1            | GC               | 427-430  | MC               |
| 2_C6                  | 1            | GC               | 427-17   | BES13            |
| 2_C7                  | 1            | GC               | 427-1963 | MC               |
| 2_C8                  | 1            | GC               | 427-9    | BES2             |
| 2_C9                  | 1            | GC               | 427-1    | UD               |
| 2_D1                  | 1            | GC               | 427-3    | BES7             |
| 2_D2                  | 1            | GC               | 427-3    | BES7             |
| 2_D3                  | 1            | GC               | 427-365  | MC               |
| 2_D4                  | 1            | GC               | 427-3    | BES7             |
| 2_D5                  | 1            | GC               | 427-2057 | MC               |
| 2_D6                  | 1            | GC               | 427-11   | BES15            |
| 2_E10                 | 2            | GC               | 427-17   | BES13            |
| 2_E11                 | 2            | GC               | 427-503  | MC               |
| 2_E12                 | 2            | GC               | 427-1    | UD               |
| 2_E2                  | 2            | GC               | 427-8    | BES14            |
| 2_E5                  | 2            | GC               | 427-3    | BES7             |
| 2_E6                  | 2            | GC               | 427-9    | BES2             |
| 2_E9                  | 2            | GC               | 427-2057 | MC               |
| 2_F1                  | 2            | GC               | 427-21   | BES4             |
| 2_F11                 | 2            | GC               | 427-8    | BES14            |
| 2_F2                  | 2            | GC               | 427-9    | BES2             |
| 2_F3                  | 2            | GC               | 427-8    | BES14            |
| 2_F4                  | 2            | GC               | 427-832  | MC               |
| 2_F6                  | 2            | GC               | 427-3039 | UD               |
| 2_F7                  | 2            | GC               | 427-12   | UD               |
| 2_G1                  | 2            | GC               | 427-18   | BES5             |
| 2_G10                 | 2            | GC               | 427-615  | UD               |
| 2_G11                 | 2            | GC               | 427-1    | UD               |
| 2_G12                 | 2            | GC               | 427-17   | BES13            |
| 2_G4                  | 2            | GC               | 427-9    | BES2             |
| 2_G6                  | 2            | GC               | 427-430  | MC               |
| 2_G7                  | 2            | GC               | 427-3039 | UD               |

|         |   |    |          |       |
|---------|---|----|----------|-------|
| 2_G9    | 2 | GC | 427-476  | MC    |
| 2_H1    | 2 | GC | 427-23   | MC    |
| 2_H5    | 2 | GC | 427-8    | BES14 |
| 4_E1    | 3 | GC | 427-8    | BES14 |
| 4_E10   | 3 | GC | 427-567  | MC    |
| 4_E11   | 3 | GC | 427-832  | MC    |
| 4_E12   | 3 | GC | 427-3    | BES7  |
| 4_E2    | 3 | GC | 427-567  | MC    |
| 4_E3    | 3 | GC | 427-3039 | UD    |
| 4_E4    | 3 | GC | 427-3039 | UD    |
| 4_E5    | 3 | GC | 427-9    | BES2  |
| 4_E6    | 3 | GC | 427-11   | BES15 |
| 4_E7    | 3 | GC | 427-12   | UD    |
| 4_E8    | 3 | GC | 427-12   | UD    |
| 4_E9    | 3 | GC | 427-832  | MC    |
| 4_F1    | 3 | GC | 427-21   | BES4  |
| 4_F10   | 3 | GC | 427-17   | BES13 |
| 4_F11   | 3 | GC | 427-631  | UD    |
| 4_F12   | 3 | GC | 427-6    | BES3  |
| 4_F2    | 3 | GC | 427-1963 | MC    |
| 4_F3    | 3 | GC | 427-8    | BES14 |
| 4_F6    | 3 | GC | 427-1    | UD    |
| 4_F7    | 3 | GC | 427-365  | MC    |
| 4_F8    | 3 | GC | 427-1    | UD    |
| 4_F9    | 3 | GC | 427-631  | UD    |
| 4_G1    | 3 | GC | 427-1    | UD    |
| 4_G2    | 3 | GC | 427-23   | MC    |
| 4_G3    | 3 | GC | 427-24   | MC    |
| 4_G4    | 3 | GC | 427-9    | BES2  |
| 4_G5    | 3 | GC | 427-476  | MC    |
| 4_G6    | 3 | GC | 427-23   | MC    |
| 5_F1    | 4 | GC | 427-9    | BES2  |
| 5_F10   | 4 | GC | 427-8    | BES14 |
| 5_F11   | 4 | GC | 427-643  | MC    |
| 5_F3    | 4 | GC | 427-3    | BES7  |
| 5_F4    | 4 | GC | 427-11   | BES15 |
| 5_F5    | 4 | GC | 427-1    | UD    |
| 5_F6    | 4 | GC | 427-3    | BES7  |
| 5_F8    | 4 | GC | 427-615  | UD    |
| 5_F9    | 4 | GC | 427-629  | MC    |
| 5_G10   | 4 | GC | 427-12   | UD    |
| 5_G11   | 4 | GC | 427-1    | UD    |
| 5_G12   | 4 | GC | 427-11   | BES15 |
| 5_G3    | 4 | GC | 427-8    | BES14 |
| 5_G5    | 4 | GC | 427-24   | MC    |
| 5_G7    | 4 | GC | 427-663  | MC    |
| 5_G9    | 4 | GC | 427-17   | BES13 |
| 5_H2    | 4 | GC | 427-1    | UD    |
| 5_H3    | 4 | GC | 427-832  | MC    |
| 5_H4    | 4 | GC | 427-3    | BES7  |
| 5_H5    | 4 | GC | 427-9    | BES2  |
| 5_H6    | 4 | GC | 427-17   | BES13 |
| 6_2_A1  | 5 | GC | 427-1    | UD    |
| 6_2_A10 | 5 | GC | 427-9    | BES2  |
| 6_2_A11 | 5 | GC | 427-9    | BES2  |

|         |   |    |          |       |
|---------|---|----|----------|-------|
| 6_2_A12 | 5 | GC | 427-6    | BES3  |
| 6_2_A2  | 5 | GC | 427-9    | BES2  |
| 6_2_A3  | 5 | GC | 427-1    | UD    |
| 6_2_A4  | 5 | GC | 427-12   | UD    |
| 6_2_A5  | 5 | GC | 427-476  | MC    |
| 6_2_A6  | 5 | GC | 427-8    | BES14 |
| 6_2_A7  | 5 | GC | 427-8    | BES14 |
| 6_2_A8  | 5 | GC | 427-8    | BES14 |
| 6_2_A9  | 5 | GC | 427-417  | UD    |
| 6_2_B1  | 5 | GC | 427-9    | BES2  |
| 6_2_B10 | 5 | GC | 427-832  | MC    |
| 6_2_B11 | 5 | GC | 427-3    | BES7  |
| 6_2_B12 | 5 | GC | 427-1    | UD    |
| 6_2_B2  | 5 | GC | 427-9    | BES2  |
| 6_2_B3  | 5 | GC | 427-8    | BES14 |
| 6_2_B4  | 5 | GC | 427-17   | BES13 |
| 6_2_B5  | 5 | GC | 427-1    | UD    |
| 6_2_B6  | 5 | GC | 427-567  | MC    |
| 6_2_B7  | 5 | GC | 427-11   | BES15 |
| 6_2_B8  | 5 | GC | 427-3039 | UD    |
| 6_2_B9  | 5 | GC | 427-17   | BES13 |
| 6_2_C1  | 5 | GC | 427-3    | BES7  |
| 6_2_C2  | 5 | GC | 427-6    | BES3  |
| 6_2_C3  | 5 | GC | 427-1    | UD    |
| 6_2_C4  | 5 | GC | 427-1963 | MC    |
| 6_2_C5  | 5 | GC | 427-8    | BES14 |

---
