# Supplementary material for: A Conserved DNA Repeat Promotes Selection of a Diverse Repertoire of Trypanosoma brucei Surface Antigens from the Genomic Archive
Source: PubMed Central journal article supplement (PMC4858185; doi:10.1371/journal.pgen.1005994), 2016-05-05
Supplement: pgen.1005994.s007.pdf [file pgen.1005994.s007.pdf]

| <b>70.I Switched Clones</b> | <b>Population #</b> | <b>Switch Mechanism</b> | <b>VSG</b> | <b>Genomic Location</b> |
|-----------------------------|---------------------|-------------------------|------------|-------------------------|
| 4_A1                        | 1                   | GC                      | 427-3      | BES7                    |
| 4_A10                       | 1                   | GC                      | 427-9      | BES2                    |
| 4_A11                       | 1                   | GC                      | 427-9      | BES2                    |
| 4_A2                        | 1                   | GC                      | 427-3      | BES7                    |
| 4_A3                        | 1                   | GC                      | 427-17     | BES13                   |
| 4_A4                        | 1                   | GC                      | 427-9      | BES2                    |
| 4_A5                        | 1                   | GC                      | 427-3      | BES7                    |
| 4_A6                        | 1                   | GC                      | 427-9      | BES2                    |
| 4_A7                        | 1                   | GC                      | 427-9      | BES2                    |
| 4_A8                        | 1                   | GC                      | 427-17     | BES13                   |
| 4_B1                        | 1                   | GC                      | 427-8      | BES14                   |
| 4_B10                       | 1                   | GC                      | 427-3      | BES7                    |
| 4_B11                       | 1                   | GC                      | 427-8      | BES14                   |
| 4_B2                        | 1                   | GC                      | 427-17     | BES13                   |
| 4_B3                        | 1                   | GC                      | 427-8      | BES14                   |
| 4_B4                        | 1                   | GC                      | 427-8      | BES14                   |
| 4_B5                        | 1                   | GC                      | 427-8      | BES14                   |
| 4_B6                        | 1                   | GC                      | 427-6      | BES3                    |
| 4_B7                        | 1                   | GC                      | 427-11     | BES15                   |
| 4_B8                        | 1                   | GC                      | 427-9      | BES2                    |
| 4_B9                        | 1                   | GC                      | 427-3      | BES7                    |
| 4_C1                        | 1                   | GC                      | 427-8      | BES14                   |
| 4_C2                        | 1                   | GC                      | 427-3      | BES7                    |
| 4_C4                        | 1                   | GC                      | 427-3      | BES7                    |
| 4_C5                        | 1                   | GC                      | 427-8      | BES14                   |
| 4_C6                        | 1                   | GC                      | 427-8      | BES14                   |
| 5_A1                        | 2                   | GC                      | 427-8      | BES14                   |
| 5_A10                       | 2                   | GC                      | 427-3      | BES7                    |
| 5_A11                       | 2                   | GC                      | 427-3      | BES7                    |
| 5_A2                        | 2                   | GC                      | 427-3      | BES7                    |
| 5_A3                        | 2                   | GC                      | 427-8      | BES14                   |
| 5_A4                        | 2                   | GC                      | 427-11     | BES15                   |
| 5_A5                        | 2                   | GC                      | 427-8      | BES14                   |
| 5_A6                        | 2                   | GC                      | 427-3      | BES7                    |
| 5_A7                        | 2                   | GC                      | 427-9      | BES2                    |
| 5_A9                        | 2                   | GC                      | 427-3      | BES7                    |
| 5_B1                        | 2                   | GC                      | 427-9      | BES2                    |
| 5_B10                       | 2                   | GC                      | 427-8      | BES14                   |
| 5_B11                       | 2                   | GC                      | 427-17     | BES13                   |
| 5_B12                       | 2                   | GC                      | 427-3      | BES7                    |
| 5_B2                        | 2                   | GC                      | 427-3      | BES7                    |
| 5_B3                        | 2                   | GC                      | 427-3      | BES7                    |
| 5_B5                        | 2                   | GC                      | 427-8      | BES14                   |
| 5_B6                        | 2                   | GC                      | 427-3      | BES7                    |
| 5_B8                        | 2                   | GC                      | 427-8      | BES14                   |
| 5_B9                        | 2                   | GC                      | 427-8      | BES14                   |
| 5_C1                        | 2                   | GC                      | 427-9      | BES2                    |

|         |   |    |        |       |
|---------|---|----|--------|-------|
| 5_C11   | 3 | GC | 427-8  | BES14 |
| 5_C12   | 3 | GC | 427-8  | BES14 |
| 5_C2    | 2 | GC | 427-9  | BES2  |
| 5_C4    | 2 | GC | 427-8  | BES14 |
| 5_C5    | 2 | GC | 427-8  | BES14 |
| 5_C6    | 2 | GC | 427-21 | BES4  |
| 5_C8    | 3 | GC | 427-8  | BES14 |
| 5_C9    | 3 | GC | 427-3  | BES7  |
| 5_D10   | 3 | GC | 427-11 | BES15 |
| 5_D11   | 3 | GC | 427-3  | BES7  |
| 5_D12   | 3 | GC | 427-11 | BES15 |
| 5_D2    | 3 | GC | 427-8  | BES14 |
| 5_D4    | 3 | GC | 427-17 | BES13 |
| 5_D6    | 3 | GC | 427-17 | BES13 |
| 5_D7    | 3 | GC | 427-17 | BES13 |
| 5_D8    | 3 | GC | 427-3  | BES7  |
| 5_D9    | 3 | GC | 427-3  | BES7  |
| 5_E1    | 3 | GC | 427-3  | BES7  |
| 5_E10   | 3 | GC | 427-11 | BES15 |
| 5_E11   | 3 | GC | 427-3  | BES7  |
| 5_E12   | 3 | GC | 427-3  | BES7  |
| 5_E2    | 3 | GC | 427-3  | BES7  |
| 5_E4    | 3 | GC | 427-3  | BES7  |
| 5_E5    | 3 | GC | 427-3  | BES7  |
| 5_E6    | 3 | GC | 427-3  | BES7  |
| 5_E8    | 3 | GC | 427-9  | BES2  |
| 5_E9    | 3 | GC | 427-9  | BES2  |
| 6_1_A1  | 4 | GC | 427-3  | BES7  |
| 6_1_A11 | 4 | GC | 427-9  | BES2  |
| 6_1_A12 | 4 | GC | 427-17 | BES13 |
| 6_1_A2  | 4 | GC | 427-9  | BES2  |
| 6_1_A3  | 4 | GC | 427-3  | BES7  |
| 6_1_A4  | 4 | GC | 427-8  | BES14 |
| 6_1_A5  | 4 | GC | 427-11 | BES15 |
| 6_1_A6  | 4 | GC | 427-8  | BES14 |
| 6_1_A7  | 4 | GC | 427-9  | BES2  |
| 6_1_A8  | 4 | GC | 427-17 | BES13 |
| 6_1_A9  | 4 | GC | 427-25 | MC    |
| 6_1_B1  | 4 | GC | 427-3  | BES7  |
| 6_1_B10 | 4 | GC | 427-17 | BES13 |
| 6_1_B11 | 4 | GC | 427-8  | BES14 |
| 6_1_B12 | 4 | GC | 427-17 | BES13 |
| 6_1_B3  | 4 | GC | 427-3  | BES7  |
| 6_1_B4  | 4 | GC | 427-9  | BES2  |
| 6_1_B5  | 4 | GC | 427-9  | BES2  |
| 6_1_B8  | 4 | GC | 427-9  | BES2  |
| 6_1_B9  | 4 | GC | 427-9  | BES2  |
| 6_1_C1  | 4 | GC | 427-11 | BES15 |
| 6_1_C2  | 4 | GC | 427-9  | BES2  |

|         |   |    |         |       |
|---------|---|----|---------|-------|
| 6_1_C3  | 4 | GC | 427-9   | BES2  |
| 6_1_C4  | 4 | GC | 427-8   | BES14 |
| 6_1_C5  | 4 | GC | 427-12  | UD    |
| 6_1_C6  | 4 | GC | 427-9   | BES2  |
| 6_1_E1  | 5 | GC | 427-17  | BES13 |
| 6_1_E10 | 5 | GC | 427-3   | BES7  |
| 6_1_E11 | 5 | GC | 427-8   | BES14 |
| 6_1_E12 | 5 | GC | 427-17  | BES13 |
| 6_1_E2  | 5 | GC | 427-17  | BES13 |
| 6_1_E3  | 5 | GC | 427-9   | BES2  |
| 6_1_E4  | 5 | GC | 427-3   | BES7  |
| 6_1_E5  | 5 | GC | 427-11  | BES15 |
| 6_1_E6  | 5 | GC | 427-17  | BES13 |
| 6_1_E7  | 5 | GC | 427-6   | BES3  |
| 6_1_E8  | 5 | GC | 427-17  | BES13 |
| 6_1_E9  | 5 | GC | 427-3   | BES7  |
| 6_1_F10 | 5 | GC | 427-8   | BES14 |
| 6_1_F11 | 5 | GC | 427-3   | BES7  |
| 6_1_F12 | 5 | GC | 427-9   | BES2  |
| 6_1_F2  | 5 | GC | 427-8   | BES14 |
| 6_1_F3  | 5 | GC | 427-23  | MC    |
| 6_1_F4  | 5 | GC | 427-11  | BES15 |
| 6_1_F5  | 5 | GC | 427-631 | UD    |
| 6_1_F6  | 5 | GC | 427-17  | BES13 |
| 6_1_F7  | 5 | GC | 427-17  | BES13 |
| 6_1_F8  | 5 | GC | 427-17  | BES13 |
| 6_1_F9  | 5 | GC | 427-21  | BES4  |
| 6_1_G1  | 5 | GC | 427-17  | BES13 |
| 6_1_G3  | 5 | GC | 427-11  | BES15 |
| 6_1_G5  | 5 | GC | 427-17  | BES13 |
| 6_1_G6  | 5 | GC | 427-3   | BES7  |

---
