# Supplementary material for: A Conserved DNA Repeat Promotes Selection of a Diverse Repertoire of Trypanosoma brucei Surface Antigens from the Genomic Archive
Source: PubMed Central journal article supplement (PMC4858185; doi:10.1371/journal.pgen.1005994), 2016-05-05
Supplement: pgen.1005994.s008.pdf [file pgen.1005994.s008.pdf]

| <b>Δ70 Switched Clones</b> | <b>Population #</b> | <b>Switch Mechanism</b> | <b>VSG</b> | <b>Genomic Location</b> |
|----------------------------|---------------------|-------------------------|------------|-------------------------|
| 1_A1                       | 1                   | GC                      | 427-8      | BES14                   |
| 1_A2                       | 1                   | GC                      | 427-9      | BES2                    |
| 1_A3                       | 1                   | GC                      | 427-9      | BES2                    |
| 1_A4                       | 1                   | GC                      | 427-3      | BES7                    |
| 1_A5                       | 1                   | GC                      | 427-3      | BES7                    |
| 1_A6                       | 1                   | GC                      | 427-21     | BES4                    |
| 1_A7                       | 1                   | GC                      | 427-3      | BES7                    |
| 1_A8                       | 1                   | GC                      | 427-11     | BES15                   |
| 1_A9                       | 1                   | GC                      | 427-8      | BES14                   |
| 1_B10                      | 1                   | GC                      | 427-8      | BES14                   |
| 1_B2                       | 1                   | GC                      | 427-8      | BES14                   |
| 1_B3                       | 1                   | GC                      | 427-9      | BES2                    |
| 1_B4                       | 1                   | GC                      | 427-9      | BES2                    |
| 1_B6                       | 1                   | GC                      | 427-8      | BES14                   |
| 1_B7                       | 1                   | GC                      | 427-9      | BES2                    |
| 1_B9                       | 1                   | GC                      | 427-17     | BES13                   |
| 1_C4                       | 1                   | GC                      | 427-11     | BES15                   |
| 1_C5                       | 1                   | GC                      | 427-3      | BES7                    |
| 1_E1                       | 2                   | GC                      | 427-18     | BES5                    |
| 1_E10                      | 2                   | GC                      | 427-8      | BES14                   |
| 1_E3                       | 2                   | GC                      | 427-9      | BES2                    |
| 1_E4                       | 2                   | GC                      | 427-11     | BES15                   |
| 1_E5                       | 2                   | GC                      | 427-9      | BES2                    |
| 1_E6                       | 2                   | GC                      | 427-9      | BES2                    |
| 1_E7                       | 2                   | GC                      | 427-8      | BES14                   |
| 1_E9                       | 2                   | GC                      | 427-17     | BES13                   |
| 1_F1                       | 2                   | GC                      | 427-17     | BES13                   |
| 1_F10                      | 2                   | GC                      | 427-17     | BES13                   |
| 1_F11                      | 2                   | GC                      | 427-9      | BES2                    |
| 1_F12                      | 2                   | GC                      | 427-9      | BES2                    |
| 1_F2                       | 2                   | GC                      | 427-17     | BES13                   |
| 1_F3                       | 2                   | GC                      | 427-11     | BES15                   |
| 1_F4                       | 2                   | GC                      | 427-17     | BES13                   |
| 1_F5                       | 2                   | GC                      | 427-17     | BES13                   |
| 1_F7                       | 2                   | GC                      | 427-17     | BES13                   |
| 1_F8                       | 2                   | GC                      | 427-11     | BES15                   |
| 1_F9                       | 2                   | GC                      | 427-9      | BES2                    |
| 1_G1                       | 2                   | GC                      | 427-17     | BES13                   |
| 1_G2                       | 2                   | GC                      | 427-17     | BES13                   |
| 1_G3                       | 2                   | GC                      | 427-17     | BES13                   |
| 1_G5                       | 2                   | GC                      | 427-17     | BES13                   |
| 1_G6                       | 2                   | GC                      | 427-17     | BES13                   |
| 1_G7                       | 2                   | GC                      | 427-8      | BES14                   |
| 3_A1                       | 3                   | GC                      | 427-6      | BES3                    |
| 3_A11                      | 3                   | GC                      | 427-3      | BES7                    |
| 3_A12                      | 3                   | GC                      | 427-9      | BES2                    |
| 3_A2                       | 3                   | GC                      | 427-3      | BES7                    |
| 3_A3                       | 3                   | GC                      | 427-3      | BES7                    |
| 3_A5                       | 3                   | GC                      | 427-11     | BES15                   |
| 3_A7                       | 3                   | GC                      | 427-3      | BES7                    |
| 3_A8                       | 3                   | GC                      | 427-11     | BES15                   |
| 3_A9                       | 3                   | GC                      | 427-3      | BES7                    |

|         |   |    |        |       |
|---------|---|----|--------|-------|
| 3_B1    | 3 | GC | 427-18 | BES5  |
| 3_B10   | 4 | GC | 427-3  | BES7  |
| 3_B12   | 4 | GC | 427-11 | BES15 |
| 3_B2    | 3 | GC | 427-11 | BES15 |
| 3_B3    | 3 | GC | 427-3  | BES7  |
| 3_B5    | 3 | GC | 427-3  | BES7  |
| 3_B6    | 3 | GC | 427-11 | BES15 |
| 3_B7    | 4 | GC | 427-3  | BES7  |
| 3_B8    | 4 | GC | 427-11 | BES15 |
| 3_B9    | 4 | GC | 427-8  | BES14 |
| 3_C1    | 4 | GC | 427-9  | BES2  |
| 3_C10   | 4 | GC | 427-17 | BES13 |
| 3_C11   | 4 | GC | 427-9  | BES2  |
| 3_C2    | 4 | GC | 427-11 | BES15 |
| 3_C3    | 4 | GC | 427-17 | BES13 |
| 3_C4    | 4 | GC | 427-3  | BES7  |
| 3_C5    | 4 | GC | 427-8  | BES14 |
| 3_C6    | 4 | GC | 427-17 | BES13 |
| 3_C9    | 4 | GC | 427-3  | BES7  |
| 3_D1    | 4 | GC | 427-3  | BES7  |
| 3_D10   | 4 | GC | 427-3  | BES7  |
| 3_D11   | 4 | GC | 427-9  | BES2  |
| 3_D2    | 4 | GC | 427-3  | BES7  |
| 3_D3    | 4 | GC | 427-3  | BES7  |
| 3_D5    | 4 | GC | 427-17 | BES13 |
| 3_D7    | 4 | GC | 427-3  | BES7  |
| 3_D8    | 4 | GC | 427-6  | BES3  |
| 3_E1    | 4 | GC | 427-11 | BES15 |
| 3_E10   | 4 | GC | 427-17 | BES13 |
| 3_E11   | 4 | GC | 427-17 | BES13 |
| 3_E12   | 4 | GC | 427-3  | BES7  |
| 3_E2    | 4 | GC | 427-17 | BES13 |
| 3_E3    | 4 | GC | 427-3  | BES7  |
| 3_E4    | 4 | GC | 427-3  | BES7  |
| 3_E5    | 4 | GC | 427-8  | BES14 |
| 3_E8    | 4 | GC | 427-8  | BES14 |
| 3_E9    | 4 | GC | 427-3  | BES7  |
| 6_2_E1  | 5 | GC | 427-3  | BES7  |
| 6_2_E10 | 5 | GC | 427-8  | BES14 |
| 6_2_E11 | 5 | GC | 427-8  | BES14 |
| 6_2_E12 | 5 | GC | 427-8  | BES14 |
| 6_2_E2  | 5 | GC | 427-11 | BES15 |
| 6_2_E3  | 5 | GC | 427-17 | BES13 |
| 6_2_E4  | 5 | GC | 427-11 | BES15 |
| 6_2_E5  | 5 | GC | 427-3  | BES7  |
| 6_2_E6  | 5 | GC | 427-9  | BES2  |
| 6_2_E7  | 5 | GC | 427-9  | BES2  |
| 6_2_E8  | 5 | GC | 427-3  | BES7  |
| 6_2_E9  | 5 | GC | 427-11 | BES15 |
| 6_2_F1  | 5 | GC | 427-9  | BES2  |
| 6_2_F10 | 5 | GC | 427-9  | BES2  |
| 6_2_F11 | 5 | GC | 427-8  | BES14 |
| 6_2_F12 | 5 | GC | 427-8  | BES14 |
| 6_2_F2  | 5 | GC | 427-11 | BES15 |
| 6_2_F3  | 5 | GC | 427-18 | BES5  |

|        |   |    |        |       |
|--------|---|----|--------|-------|
| 6_2_F4 | 5 | GC | 427-9  | BES2  |
| 6_2_F5 | 5 | GC | 427-17 | BES13 |
| 6_2_F6 | 5 | GC | 427-11 | BES15 |
| 6_2_F7 | 5 | GC | 427-9  | BES2  |
| 6_2_F8 | 5 | GC | 427-9  | BES2  |
| 6_2_F9 | 5 | GC | 427-9  | BES2  |
| 6_2_G1 | 5 | GC | 427-3  | BES7  |
| 6_2_G2 | 5 | GC | 427-9  | BES2  |
| 6_2_G3 | 5 | GC | 427-8  | BES14 |
| 6_2_G4 | 5 | GC | 427-9  | BES2  |
| 6_2_G5 | 5 | GC | 427-3  | BES7  |
| 6_2_G6 | 5 | GC | 427-9  | BES2  |

---
