# Supplementary material for: A Conserved DNA Repeat Promotes Selection of a Diverse Repertoire of Trypanosoma brucei Surface Antigens from the Genomic Archive
Source: PubMed Central journal article supplement (PMC4858185; doi:10.1371/journal.pgen.1005994), 2016-05-05
Supplement: pgen.1005994.s009.pdf [file pgen.1005994.s009.pdf]

**VSG-seq data from minimal repeat introductions**

| <b>Lister427<br/>VSG</b> | <b>Genomic<br/>Location</b> | <b>Δ70.1</b> | <b>Δ70.2</b> | <b>Δ70.3</b> | <b>Dimer.1</b> | <b>Dimer.2</b> | <b>Dimer.3</b> | <b>Dimer_Rv.1</b> | <b>Dimer_Rv.2</b> | <b>Dimer_Rv.3</b> |
|--------------------------|-----------------------------|--------------|--------------|--------------|----------------|----------------|----------------|-------------------|-------------------|-------------------|
| 427-17var                | BES                         | 34.752       | 32.573       | 26.054       | 22.406         | 22.376         | 19.322         | 24.194            | 27.162            | 24.058            |
| 427-3                    | BES                         | 19.772       | 20.794       | 28.207       | 10.023         | 13.791         | 14.816         | 27.848            | 21.828            | 24.417            |
| 427-8                    | BES                         | 12.571       | 13.389       | 16.999       | 29.894         | 25.909         | 28.281         | 17.361            | 17.808            | 16.798            |
| 427-11                   | BES                         | 15.516       | 14.159       | 11.977       | 20.480         | 21.783         | 18.646         | 16.872            | 18.750            | 18.043            |
| 427-9                    | BES                         | 6.472        | 6.158        | 5.038        | 5.859          | 5.834          | 7.258          | 5.098             | 4.809             | 4.305             |
| 427-18                   | BES                         | 3.578        | 3.810        | 5.203        | 3.088          | 2.507          | 2.067          | 2.309             | 2.544             | 2.746             |
| 427-13var                | BES                         | 1.020        | 1.099        | 1.036        | 0.976          | 1.775          | 0.989          | 2.468             | 2.762             | 4.165             |
| 427-21                   | BES                         | 1.177        | 1.387        | 1.003        | 2.585          | 2.203          | 2.483          | 1.154             | 2.008             | 1.590             |
| 427-6                    | BES                         | 0.789        | 0.761        | 0.422        | 1.471          | 1.198          | 2.229          | 1.031             | 0.771             | 1.112             |
| 427-631var               | UD                          | 0.927        | 0.783        | 0.670        | 0.608          | 0.496          | 0.778          | 0.367             | 0.315             | 0.565             |
| 427-775var               | UD                          | 0.241        | 0.264        | 0.144        | 0.158          | 0.162          | 0.220          | 0.852             | 0.695             | 0.985             |
| 427-15                   | BES                         | 0.518        | 0.439        | 0.483        | 0.179          | 0.087          | 0.143          | 0.076             | 0.081             | 0.237             |
| 427-653                  | MES                         | 0.460        | 0.273        | 0.265        | 0.064          | 0.050          | 0.113          | 0.032             | 0.057             | 0.126             |
| 427-531                  | MES                         | 0.169        | 0.171        | 0.192        | 0.032          | 0.023          | 0.059          | 0.050             | 0.035             | 0.091             |
| 427-1                    | UD                          | 0.000        | 0.000        | 0.000        | 0.135          | 0.067          | 0.112          | 0.119             | 0.104             | 0.112             |
| 427-663                  | MC                          | 0.000        | 0.000        | 0.000        | 0.159          | 0.127          | 0.327          | 0.000             | 0.000             | 0.000             |
| 427-417                  | UD                          | 0.000        | 0.000        | 0.000        | 0.252          | 0.134          | 0.201          | 0.000             | 0.000             | 0.000             |
| 427-567                  | MC                          | 0.000        | 0.000        | 0.000        | 0.060          | 0.223          | 0.156          | 0.000             | 0.000             | 0.000             |
| 427-22                   | MC                          | 0.000        | 0.000        | 0.000        | 0.120          | 0.081          | 0.192          | 0.000             | 0.000             | 0.000             |
| 427-1963                 | MC                          | 0.000        | 0.000        | 0.000        | 0.167          | 0.077          | 0.142          | 0.000             | 0.000             | 0.000             |
| 427-615                  | UD                          | 0.011        | 0.000        | 0.000        | 0.115          | 0.026          | 0.108          | 0.000             | 0.124             | 0.000             |
| 427-25                   | MC                          | 0.000        | 0.019        | 0.000        | 0.076          | 0.071          | 0.130          | 0.022             | 0.000             | 0.026             |
| 427-636                  | UD                          | 0.043        | 0.035        | 0.044        | 0.013          | 0.014          | 0.032          | 0.020             | 0.036             | 0.091             |
| 427-629                  | MC                          | 0.000        | 0.000        | 0.000        | 0.020          | 0.105          | 0.075          | 0.013             | 0.000             | 0.000             |
| 427-2057var1             | MC                          | 0.000        | 0.000        | 0.000        | 0.077          | 0.037          | 0.067          | 0.000             | 0.000             | 0.016             |
| 427-12                   | UD                          | 0.000        | 0.000        | 0.000        | 0.081          | 0.052          | 0.040          | 0.000             | 0.000             | 0.000             |
| 427-3039var              | UD                          | 0.000        | 0.000        | 0.000        | 0.050          | 0.050          | 0.056          | 0.000             | 0.000             | 0.000             |
| 427-416                  | MC                          | 0.000        | 0.000        | 0.000        | 0.063          | 0.040          | 0.052          | 0.000             | 0.000             | 0.000             |
| 427-1591var              | UD                          | 0.015        | 0.014        | 0.016        | 0.015          | 0.010          | 0.033          | 0.011             | 0.000             | 0.015             |
| 427-365                  | MC                          | 0.000        | 0.054        | 0.018        | 0.000          | 0.000          | 0.018          | 0.014             | 0.000             | 0.000             |
| 427-322                  | UD                          | 0.000        | 0.000        | 0.000        | 0.021          | 0.011          | 0.053          | 0.000             | 0.000             | 0.011             |
| 427-23                   | MC                          | 0.000        | 0.026        | 0.000        | 0.000          | 0.015          | 0.042          | 0.000             | 0.000             | 0.000             |
| 427-476                  | MC                          | 0.000        | 0.000        | 0.000        | 0.014          | 0.000          | 0.041          | 0.000             | 0.000             | 0.000             |
| 427-14var                | BES                         | 0.000        | 0.012        | 0.000        | 0.011          | 0.000          | 0.019          | 0.000             | 0.000             | 0.012             |
| 427-430                  | MC                          | 0.000        | 0.000        | 0.000        | 0.015          | 0.000          | 0.036          | 0.000             | 0.000             | 0.000             |
| 427-2057var2             | MC                          | 0.000        | 0.000        | 0.000        | 0.016          | 0.000          | 0.010          | 0.012             | 0.000             | 0.012             |
| 427-1123                 | UD                          | 0.000        | 0.000        | 0.000        | 0.010          | 0.013          | 0.021          | 0.000             | 0.000             | 0.000             |
| 427-510                  | UD                          | 0.000        | 0.000        | 0.000        | 0.000          | 0.000          | 0.037          | 0.000             | 0.000             | 0.000             |
| 427-374                  | MC                          | 0.000        | 0.000        | 0.000        | 0.000          | 0.000          | 0.026          | 0.000             | 0.000             | 0.000             |
| 427-1387var              | UD                          | 0.000        | 0.000        | 0.000        | 0.000          | 0.000          | 0.024          | 0.000             | 0.000             | 0.000             |
| 427-24var                | MC                          | 0.000        | 0.000        | 0.000        | 0.000          | 0.000          | 0.013          | 0.000             | 0.000             | 0.000             |
| 427-637                  | MC                          | 0.000        | 0.000        | 0.000        | 0.000          | 0.000          | 0.000          | 0.000             | 0.000             | 0.011             |
| 427-503var               | MC                          | 0.000        | 0.000        | 0.000        | 0.000          | 0.000          | 0.000          | 0.000             | 0.000             | 0.010             |
| 427-1var                 | UD                          | 0.000        | 0.000        | 0.000        | 0.000          | 0.000          | 0.000          | 0.010             | 0.000             | 0.000             |

"var" - indicates that it the identified sequence is a minor variation of the published sequence for the corresponding VSG#.
