# Supplementary material for: A Conserved DNA Repeat Promotes Selection of a Diverse Repertoire of Trypanosoma brucei Surface Antigens from the Genomic Archive
Source: PubMed Central journal article supplement (PMC4858185; doi:10.1371/journal.pgen.1005994), 2016-05-05
Supplement: pgen.1005994.s010.pdf [file pgen.1005994.s010.pdf]

## 70.II-ISceI Construction

"70.IIRS\_GHMFw1":

AATAGGAGAGTGTGGTGTGAGTGTGTGCTTACCAATATTATAATAATGATAGTAACGACCAAT  
AGGGATAACAGGGTAATACCGGTATAACTTCGTATAGCATAACATTATACGAAGTTATCTCG

"70.IIRS\_GHMRv1":

CAAATCCATTATACTCACGATTACTCTCATTGCACACATACCATTGTCTTAACTGCATTTAT  
TTATGGTTTGTATTTCGTACATAACTTCGTATAATGTATGCTATACGAAGTTATCCTCTAATCC  
TTTCACTCTTCCG

## 70.I-ISceI Construction

"70.IRS\_Fw1":

ATATGCGGCCGCATGACAGCAGTTTTAGACACTAAAGGCGGAGCCCAAATAGAGGCACTT  
ACAACCTTTAGAAAAAATTAATTAGAGTAGGGATAACAGGGTAATACCGGTATAACTTCGT  
ATAGCATAACATTATACGAAGTTATCTCG

"70.IRS\_Rv1":

ATATGCGGCCGCATGCAGCTGCGCATATACAATATCACTTTCTATATTTGTCTTTCTGCGT  
TTCCTTTAATATATTTCTAAGTGCGCTCCAACCTTACATAACTTCGTATAATGTATGCTATAC  
GAAGTTATCCTCTAATCCTTTCACTCTTCCG

**Δ70-ISceI Construction: Flanking regions were sewn to PURO cassette by long-flanking homology PCR.** Oligos for amplification of the 5' and 3' flanking homology regions are shown. PCR product resulted in ~1.5Kb of homology to BES1 on each side of cassette.

5'-Flanking homology

"NotI ESAG1 UQ Fw":

ATATGCGGCCGCATGGAAGAGCAAACCTGATAGGTTGGAAAAGC

"-70 P2 NEW":

CCCTCGAGATAACTTCGTATAATGTATGCTATACGAAGTTATACCGGTATTACCCTGTTAT  
CCCTACTTTTAACCTTGTGCCCCGACCTTTACAGTC

3'-Flanking homology

"-70 P2 #3 (KpnI)":

CCCTCGAGATAACTTCGTATAATGTATGCTATACGAAGTTATTATTACCCTGTTATCCCTAG  
GTACCCTTTTAACCTTGTGCCCCGACCTTTACAGTC

"VSG221 5'NotI Rv1":

ATATGCGGCCGCATGGAAGAACTTGGGCTAGGACCAAGACG

## Monomer Oligo

### 6-77-Fw

ATAGGTACCATAATAATAATAATAATAATAATAATAGGAGAGTGTGGTGTGAGTGTGTGTATAT  
ACGAATATTATAATAAGAGCAGTAATAATAATAATAATAGGTACCATA

### Dimer Oligo

#### 2x-6-77-Fw

ATAGGTACCATAATAATAATAATAATAATAATAATAATAGGAGAGTGTGGTGTGAGTGTGTGTATAT  
ACGAATATTATAATAAGAGCAGTAATAATAATAATAATAATAATAATAATAATAATAATAATAGGAGA  
GTGGTGTGAGTGTGTGTATATACGAATATTATAATAAGAGCAGTAATAATAATAATAATAGGTAC  
CATA

### Mut\_Dimer Oligo

#### 2x-6-77mut\_Fw

ATAGGTACCATAATAATAATAATAATAATAATAATAATAAAAAAAAAATTATAAATATATATATATAT  
AAATATTATAATAAAAAATAATAATAATAATAATAATAATAATAATAATAATAATAATAATAATAATA  
TATAAATATATATATATAAATATTATAATAAAAAATAATAATAATAATAATAATAATAGGTACCATA
